# Supplementary material for: Isolation and Identification of Porcine Deltacoronavirus and Alteration of Immunoglobulin Transport Receptors in the Intestinal Mucosa of PDCoV-Infected Piglets
Source: PubMed Central journal article supplement (PMC7019308; doi:10.3390/v12010079), 2020-01-09
Supplement: viruses-12-00079-s001.pdf [file viruses-12-00079-s001.pdf]

**Table S1.** Primers for amplifications of the PDCoV genomic fragments by RT-qPCR.

| Name    | Sequence(5'to3')        | Position in PDCoV genome | Size(bp) |
|---------|-------------------------|--------------------------|----------|
| 1F      | GTTCTCTACCGACACCAATCCA  | 64–85                    | 1800     |
| 1R      | GGGTAAGATCCTGGAGTTCACG  | 1842–1863                |          |
| 2F      | ATCTTGGGCTATCATTGAGCGT  | 1706–1724                | 1587     |
| 2R      | CCTACATCAGTGCTGTCCGTT   | 3271–3292                |          |
| 3F      | AGTACCAGTAACACCTGCGGAT  | 3074–3095                | 1802     |
| 3R      | CTACCCAAAACACTCCACGACT  | 4854–4875                |          |
| 4F      | TCTGGACATTTTGGATCTTTGGA | 4805–4827                | 1714     |
| 4R      | GATGCGAGTCAAGGGCTGTGTT  | 6497–6518                |          |
| 5F      | AGTCAGCAGGCTATACGTGTGA  | 6399–6420                | 1785     |
| 5R      | GCGTGGGCAGTAGACAACATTC  | 8162–8183                |          |
| 6F      | GGAGGCGGTTACAGTTGTA     | 7995–8014                | 1807     |
| 6R      | CAGCAATGTTACGGTTTCCACC  | 9780–9801                |          |
| 7F      | AGTTAAGATGTCCCCACCGC    | 9713–9732                | 1878     |
| 7R      | TTAGGTAAAGGCAGGGCACT    | 11567–11586              |          |
| 8F      | TAACGGGTTCTAGTGACGCC    | 11418–11437              | 1747     |
| 8R      | TGTTCCAATCACGATGGTCTGA  | 13144–13164              |          |
| 9F      | TGCCTACACTCACTCAGATGA   | 12999–13019              | 1886     |
| 9R      | CGGTGTAACAACATGTGCCAT   | 14864–14884              |          |
| 10F     | GCTAAAACAGATGGCAGTGACA  | 14783–14804              | 1850     |
| 10R     | TTAGTGAAACAAGCCCGCCT    | 16613–16632              |          |
| 11F     | TGCTTTGTCACTTGGGCTCA    | 16526–16545              | 1797     |
| 11R     | GCTTGCGTTAGGTGAGGTAAC   | 18302–18322              |          |
| 12F     | TTGGCGGAACTCACACACTT    | 18210–18229              | 1800     |
| 12R     | TGACCCCGATACAACCTAACA   | 19989–20009              |          |
| 13F     | GTGAGCAGTTTAACTACACCACT | 19796–19818              | 1711     |
| 13R     | TTCTCAGCATCAACAACACCA   | 21486–21506              |          |
| 14F     | AGCAGCATACTAACCACCAGA   | 21310–21330              | 1745     |
| 14R     | ACTAGGGTGAAGGGTTGGAGCA  | 23032–23054              |          |
| 15F     | ACCAACCAACACCGTCCTTT    | 22768–22789              | 1503     |
| 15R     | GGGGTATCATTAGGAGGGAGT   | 24250–24270              |          |
| 16F     | GACCCTCTCGTTAAAACCTCGC  | 23784–23804              | 1639     |
| 16R     | GCTCCATCCCCCTATAAGCCAA  | 25400–25422              |          |
| 5'RACE  | GCAACACAATACGCCAGAT     | 454–473                  |          |
| 3' RACE | AGCCACCTACCAAACCAACT    | 24870–24899              |          |

**Table S2.** Primers used for RT-qPCR analysis of genes expression of piglet intestinal mucosa

| gene name             | Primer Sequence (5'-3'') | Amplicon Length | Accession number |
|-----------------------|--------------------------|-----------------|------------------|
| GAPDH-F               | GGAAAGGCCATCACCATCTT     | 85 bp           | XM_021091114.1   |
| GAPDH-R               | CATGGTCGTGAAGACACCAG     |                 |                  |
| FcRn-F                | GGCGACGAGCACCCTACTG      | 88 bp           | HQ026019.1       |
| FcRn-R                | AGCCGACCATGATTCCAACC     |                 |                  |
| pIgR-F                | AGCCAACCTCACCAACTTCC     | 105bp           | AB032195.2       |
| pIgR-R                | CTGCTAATGCCCAGACCAC      |                 |                  |
| NF- $\kappa$ B(p65)-F | ACATGGACTTCTCAGCCCTTCTGA | 285 bp          | CN155798.1       |
| NF- $\kappa$ B(p65)-R | CCGAAGACATCACCCAAAGATGCT |                 |                  |
